# Supplementary material for: Different Expressions of HIF-1α and Metabolism in Brain and Major Visceral Organs of Acute Hypoxic Mice
Source: MDPI journal article supplement (doi:10.3390/ijms22136705), 2021-06-22
Supplement: s1 [file s1]

# Supplementary Material

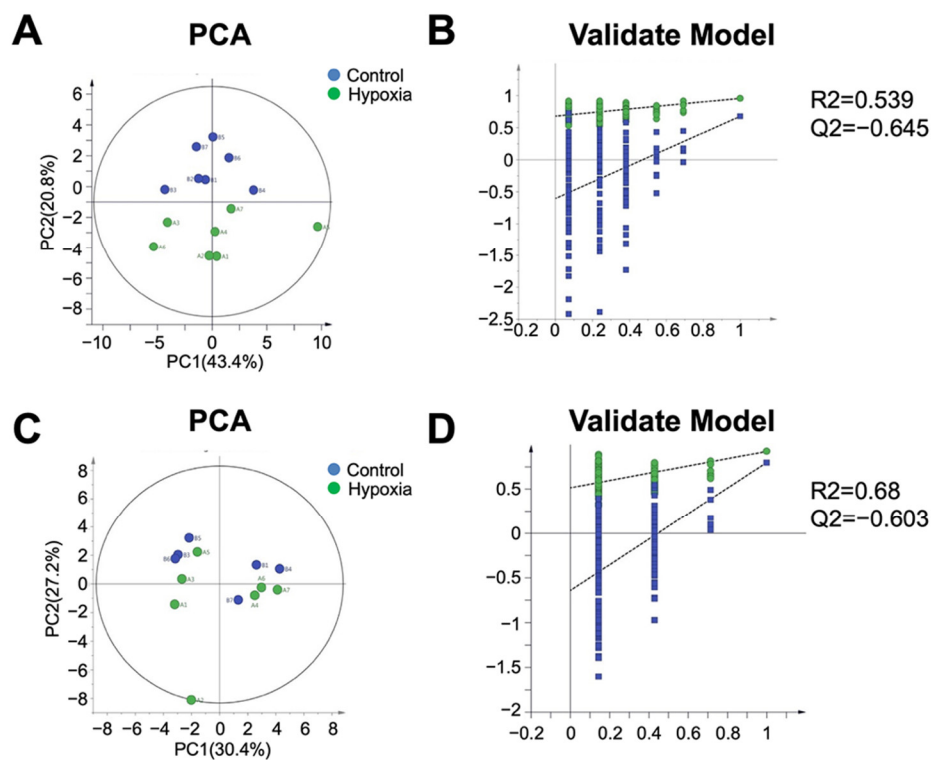

**Supplementary Figure S1. PLS-DA score plots and validation plots of 1D  $^1\text{H}$  NMR data for aqueous extracts derived from the kidney and brain of mice. (A, B) Hypoxia kidney vs. normoxic kidney; (C, D) Hypoxia brain vs. normoxic brain. The PLS-DA models were cross-validated to evaluate the robustness by a random permutation test (200 cycles).  $n=6-7$  mice/group.**

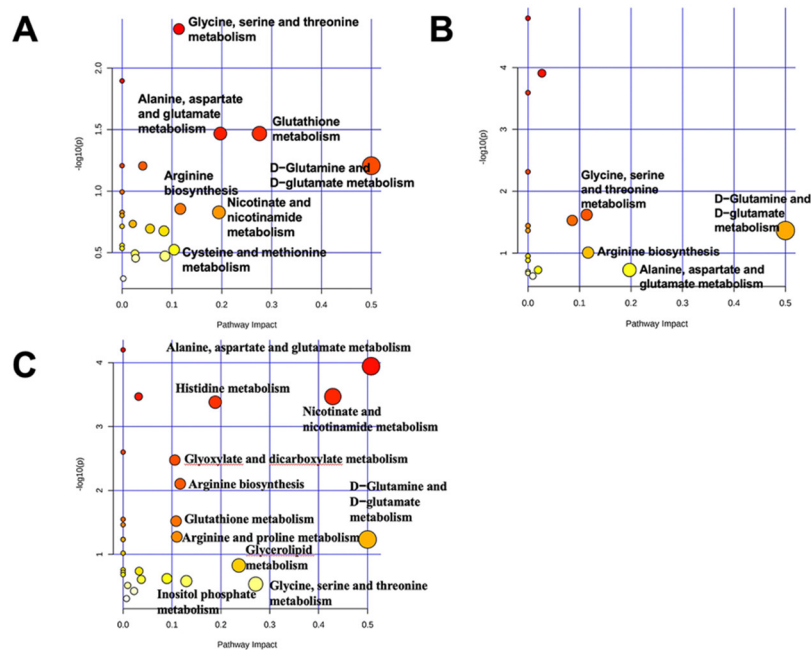

**Supplementary Figure S2. Significantly altered metabolic pathways associated with the hypoxia mice relative to normoxic mice.** (A) Hypoxia liver vs. normoxic liver; (B) Hypoxia kidney vs. normoxic kidney; (C) Hypoxia brain vs. normoxic brain. Based on the significant metabolites, significantly altered metabolic pathways were identified with  $p$  values  $< 0.005$ , using the Pathway Analysis module provided by MetaboAnalyst 4.0.

**Supplementary Table S1. Comparison of metabolite levels between two groups of mice based on relative integrals calculated from the 1D <sup>1</sup>H NMR spectra of liver.**

| Metabolites          | Mean ± standard deviation |               | Hypoxia      |
|----------------------|---------------------------|---------------|--------------|
|                      | Normoxic liver            | Hypoxic liver | vs. Normoxia |
| 3-Hydroxyisobutyrate | 0.201±0.034               | 0.295±0.072   | *            |
| Acetate              | 0.512±0.118               | 0.519±0.1266  | NS           |
| Alanine              | 3.134±0.408               | 3.612±0.314   | *            |
| Asparagine           | 0.225±0.029               | 0.220±0.026   | NS           |
| Aspartate            | 0.089±0.016               | 0.090±0.015   | NS           |
| Betaine              | 1.372±0.217               | 2.219±0.617   | *            |
| Choline              | 2.183±0.214               | 1.443±0.405   | **           |
| Creatine phosphate   | 0.354±0.059               | 0.363±0.041   | NS           |
| Dimethylamine        | 0.078±0.010               | 0.068±0.005   | *            |
| Ethanol              | 0.512±0.132               | 0.594±0.410   | NS           |
| Fumarate             | 0.119±0.029               | 0.135±0.034   | NS           |
| Glucose              | 4.493±1.335               | 5.442±0.967   | NS           |
| Glutamate            | 1.149±0.213               | 1.481±0.206   | *            |
| Glutamine            | 1.761±0.234               | 1.932±0.312   | NS           |
| Glutathione          | 0.587±0.158               | 0.404±0.073   | *            |
| Histamine            | 0.131±0.020               | 0.131±0.015   | NS           |
| Inosine              | 0.280±0.032               | 0.230±0.030   | *            |
| Isoleucine           | 0.345±0.064               | 0.339±0.048   | NS           |
| Lactate              | 10.956±0.820              | 9.267±1.091   | *            |
| Leucine              | 1.501±0.267               | 1.591±0.254   | NS           |
| Malate               | 0.287±0.038               | 0.326±0.071   | NS           |
| Methionine           | 0.278±0.035               | 0.658±0.244   | **           |
| Methylguanidine      | 0.031±0.005               | 0.025±0.007   | NS           |
| Niacinamide          | 0.173±0.020               | 0.147±0.017   | *            |
| N-Methylhydantoin    | 0.179±0.025               | 0.160±0.013   | NS           |
| Phenylalanine        | 0.174±0.029               | 0.173±0.027   | NS           |
| Lysine               | 0.826±0.123               | 0.866±0.113   | NS           |
| sarcosine            | 0.114±0.023               | 0.110±0.018   | NS           |
| Succinate            | 0.741±0.151               | 0.621±0.223   | NS           |
| Trimethylamine       | 0.102±0.023               | 0.085±0.009   | NS           |
| Tyrosine             | 0.180±0.034               | 0.163±0.023   | NS           |
| Valine               | 0.558±0.101               | 0.599±0.095   | NS           |
| β -Alanine           | 0.431±0.051               | 0.471±0.054   | NS           |
| Acetone              | 0.047±0.007               | 0.061±0.013   | *            |
| N,N-Dimethylglycine  | 0.029±0.006               | 0.023±0.003   | *            |
| Ornithine            | 0.483±0.066               | 0.484±0.041   | NS           |
| Glycine              | 1.379±0.167               | 1.231±0.120   | NS           |
| Ascorbate            | 0.213±0.029               | 0.147±0.030   | **           |
| Mannose              | 0.188±0.060               | 0.175±0.049   | NS           |

|                       |     |             |             |    |
|-----------------------|-----|-------------|-------------|----|
| Glycerophosphocholine |     | 2.469±1.082 | 1.550±0.484 | NS |
| uridine               |     | 0.300±0.065 | 0.175±0.028 | ** |
| uracil                |     | 0.053±0.013 | 0.057±0.008 | NS |
| Adenosine             | 5'- | 0.099±0.036 | 0.065±0.038 | NS |
| monophosphate         |     |             |             |    |
| Dihydrouracil         |     | 0.483±0.053 | 1.022±0.331 | ** |

Note: NS,  $p > 0.05$ ; \*,  $p < 0.05$ ; \*\*,  $p < 0.01$ ; \*\*\*,  $p < 0.001$  for hypoxia liver vs. normoxic liver as determined the Student's t test. Red and blue colors denote that the difference is positive (i.e. A was increased compared to B) and negative, respectively.

**Supplementary Table S2. Comparison of metabolite levels between two groups of mice based on relative integrals calculated from the 1D <sup>1</sup>H NMR spectra of kidney.**

| Metabolites                 | Mean ± standard deviation |                | Hypoxia      |
|-----------------------------|---------------------------|----------------|--------------|
|                             | Normoxic kidney           | Hypoxic kidney | vs. Normoxia |
| Threonine                   | 0.458±0.502               | 0.431±0.095    | NS           |
| O-Phosphocholine            | 1.364±0.181               | 0.978±0.249    | **           |
| Pantothenate                | 0.080±0.006               | 0.119±0.042    | NS           |
| Isoleucine                  | 0.249±0.039               | 0.317±0.061    | *            |
| Leucine                     | 1.108±0.193               | 1.398±0.282    | *            |
| Valine                      | 0.433±0.072               | 0.576±0.119    | *            |
| 3-Hydroxyisobutyrate        | 0.028±0.004               | 0.042±0.008    | **           |
| Ethanol                     | 0.176±0.044               | 0.164±0.030    | NS           |
| 3-Hydroxybutyrate           | 0.112±0.016               | 0.147±0.023    | **           |
| Lactate                     | 6.205±0.948               | 6.822±1.751    | NS           |
| 2-Phenylpropionate          | 0.154±0.019               | 0.172±0.028    | NS           |
| Alanine                     | 1.211±0.166               | 1.482±0.301    | NS           |
| Acetate                     | 0.390±0.108               | 0.367±0.082    | NS           |
| Glutamate                   | 2.938±0.561               | 2.297±0.496    | *            |
| Methionine                  | 0.310±0.032               | 0.371±0.073    | NS           |
| Succinate                   | 0.570±0.112               | 0.543±0.157    | NS           |
| 5,6-Dihydrouracil           | 0.378±0.037               | 0.452±0.080    | NS           |
| Aspartate                   | 0.217±0.022               | 0.214±0.041    | NS           |
| Asparagine                  | 0.196±0.030               | 0.216±0.044    | NS           |
| Trimethylamine              | 0.068±0.020               | 0.054±0.012    | NS           |
| Dimethylamine               | 0.049±0.006               | 0.049±0.001    | NS           |
| N,N-Dimethylglycine         | 0.031±0.005               | 0.045±0.010    | **           |
| N-Methylhydantoin           | 0.020±0.003               | 0.022±0.003    | NS           |
| Creatine phosphate          | 0.759±0.155               | 1.028±0.218    | *            |
| Creatinine                  | 0.164±0.020               | 0.196±0.035    | NS           |
| N,N-Dimethylformamide       | 0.111±0.012               | 0.124±0.021    | NS           |
| Malonate                    | 0.199±0.027               | 0.221±0.061    | NS           |
| Ethanolamine                | 0.663±0.083               | 0.681±0.163    | NS           |
| Choline                     | 7.272±0.706               | 5.958±1.616    | NS           |
| Cystine                     | 0.406±0.063               | 0.338±0.073    | NS           |
| Betaine                     | 3.096±0.547               | 3.995±0.789    | *            |
| sn-Glycero-3-phosphocholine | 2.553±0.473               | 2.189±0.468    | NS           |
| myo-Inositol                | 2.594±0.355               | 2.481±0.488    | NS           |
| Taurine                     | 4.160±0.561               | 3.872±0.951    | NS           |
| Methanol                    | 1.642±0.844               | 0.903±0.488    | NS           |
| Glycine                     | 2.569±0.422               | 2.176±0.460    | NS           |
| Glycerol                    | 1.263±0.165               | 1.255±0.353    | NS           |
| Glucose                     | 0.361±0.116               | 0.422±0.172    | NS           |
| Inosine                     | 0.535±0.046               | 0.537±0.108    | NS           |

|                              |         |             |             |    |
|------------------------------|---------|-------------|-------------|----|
| Mannose                      |         | 0.063±0.018 | 0.066±0.017 | NS |
| Glucuronate                  |         | 0.029±0.005 | 0.039±0.021 | NS |
| Allantoin                    |         | 0.043±0.006 | 0.061±0.015 | *  |
| Uracil                       |         | 0.089±0.012 | 0.095±0.021 | NS |
| Uridine                      |         | 0.237±0.022 | 0.251±0.058 | NS |
| Nicotinamide<br>dinucleotide | adenine | 0.011±0.001 | 0.012±0.002 | NS |
| Fumarate                     |         | 0.031±0.005 | 0.030±0.005 | NS |
| Tyrosine                     |         | 0.174±0.029 | 0.214±0.043 | NS |
| Histamine                    |         | 0.064±0.010 | 0.075±0.018 | NS |
| Anserine                     |         | 0.011±0.004 | 0.008±0.002 | NS |
| Phenylalanine                |         | 0.392±0.070 | 0.482±0.112 | NS |
| Imidazole                    |         | 0.032±0.003 | 0.036±0.009 | NS |
| Niacinamide                  |         | 0.137±0.015 | 0.143±0.030 | NS |
| Tryptophan                   |         | 0.019±0.004 | 0.024±0.006 | NS |
| Xanthine                     |         | 0.109±0.013 | 0.111±0.030 | NS |
| 4-Pyridoxate                 |         | 0.072±0.012 | 0.078±0.042 | NS |
| 3-Methylxanthine             |         | 0.015±0.004 | 0.018±0.003 | NS |
| Adenine                      |         | 0.662±0.123 | 0.696±0.133 | NS |
| Formate                      |         | 0.008±0.002 | 0.008±0.001 | NS |
| Inosinic acid                |         | 0.011±0.002 | 0.011±0.003 | NS |

Note: NS,  $p > 0.05$ ; \*,  $p < 0.05$ ; \*\*,  $p < 0.01$ ; \*\*\*,  $p < 0.001$  for hypoxic kidney vs. normoxic kidney as determined by the Student's t test. Red and blue colors denote that the difference is positive (i.e. A was increased compared to B) and negative, respectively.

**Table S3. Comparison of metabolite levels between two groups of mice based on relative integrals calculated from the 1D <sup>1</sup>H NMR spectra of brain.**

| Metabolites                 | Mean ± standard deviation |               | Hypoxia      |
|-----------------------------|---------------------------|---------------|--------------|
|                             | Normoxic brain            | Hypoxic brain | vs. Normoxia |
| Isoleucine                  | 0.071±0.005               | 0.082±0.009   | *            |
| Leucine                     | 0.255±0.019               | 0.298±0.028   | **           |
| Valine                      | 0.127±0.005               | 0.134±0.016   | NS           |
| 3-Hydroxyisobutyrate        | 0.039±0.005               | 0.039±0.006   | NS           |
| Ethanol                     | 0.541±0.228               | 0.456±0.216   | NS           |
| 3-Hydroxybutyrate           | 0.119±0.029               | 0.148±0.032   | NS           |
| Lactate                     | 9.252±1.322               | 7.779±1.010   | NS           |
| Alanine                     | 0.650±0.086               | 0.655±0.074   | NS           |
| 4-Aminobutyrate             | 2.324±0.213               | 2.678±0.297   | *            |
| Acetate                     | 0.667±0.101               | 0.769±0.116   | NS           |
| N-Acetylaspartate           | 2.571±0.177               | 2.584±0.190   | NS           |
| Glutamate                   | 2.790±0.131               | 3.173±0.199   | **           |
| Glutamine                   | 1.686±0.165               | 1.545±0.125   | NS           |
| Succinate                   | 0.171±0.042               | 0.232±0.047   | *            |
| Aspartate                   | 0.648±0.259               | 0.739±0.047   | **           |
| Creatine phosphate          | 4.693±0.184               | 4.765±0.441   | NS           |
| Taurine                     | 3.292±0.350               | 3.122±0.325   | NS           |
| O-Phosphocholine            | 0.585±0.081               | 1.111±0.140   | ***          |
| sn-Glycero-3-phosphocholine | 1.123±0.076               | 1.215±0.127   | NS           |
| Myo-Inositol                | 2.072±0.072               | 2.240±0.132   | *            |
| Caffeine                    | 0.182±0.262               | 0.160±0.037   | NS           |
| Glycine                     | 0.798±0.060               | 0.683±0.071   | *            |
| Glycerol                    | 0.824±0.059               | 0.746±0.064   | *            |
| Ascorbate                   | 0.277±0.019               | 0.277±0.029   | NS           |
| Glucose                     | 0.008±0.006               | 0.005±0.003   | NS           |
| Uracil                      | 0.021±0.003               | 0.024±0.003   | NS           |
| Uridine                     | 0.052±0.001               | 0.050±0.003   | NS           |
| Guanosine triphosphate      | 0.020±0.002               | 0.023±0.002   | *            |
| Inosine                     | 0.304±0.016               | 0.312±0.017   | NS           |
| Fumarate                    | 0.059±0.009               | 0.061±0.004   | NS           |
| Tyrosine                    | 0.063±0.005               | 0.064±0.007   | NS           |
| Histamine                   | 0.015±0.002               | 0.019±0.002   | *            |
| Adenosine                   | 0.015±0.002               | 0.018±0.005   | NS           |
| Inosinic acid               | 0.023±0.005               | 0.028±0.008   | NS           |
| Formate                     | 0.004±0.001               | 0.006±0.001   | ***          |
| Adenine                     | 0.120±0.013               | 0.1189±0.026  | NS           |

|                                      |             |             |    |
|--------------------------------------|-------------|-------------|----|
| Adenosine<br>monophosphate           | 0.023±0.005 | 0.028±0.008 | NS |
| Niacinamide                          | 0.056±0.002 | 0.062±0.004 | ** |
| Nicotinamide<br>adenine dinucleotide | 0.003±0.002 | 0.006±0.001 | ** |

Note: NS,  $p > 0.05$ ; \*,  $p < 0.05$ ; \*\*,  $p < 0.01$ ; \*\*\*,  $p < 0.001$  for hypoxic brain vs. normoxic brain as determined by the Student's t test. Red and blue colors denote that the difference is positive (i.e. A was increased compared to B) and negative, respectively.
